# Supplementary material
Source: PubMed Central journal article supplement (PMC1892953)

**A**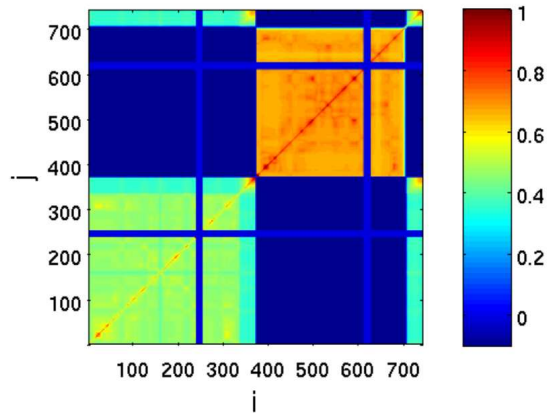**B**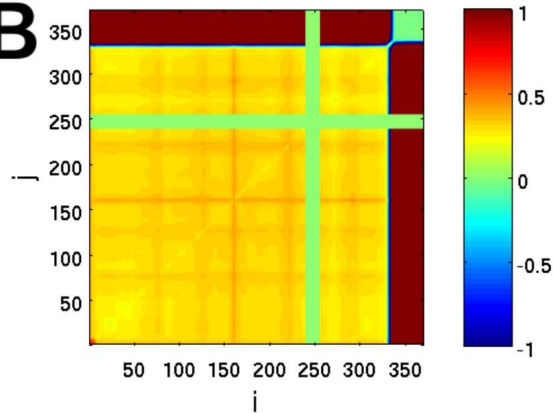**C**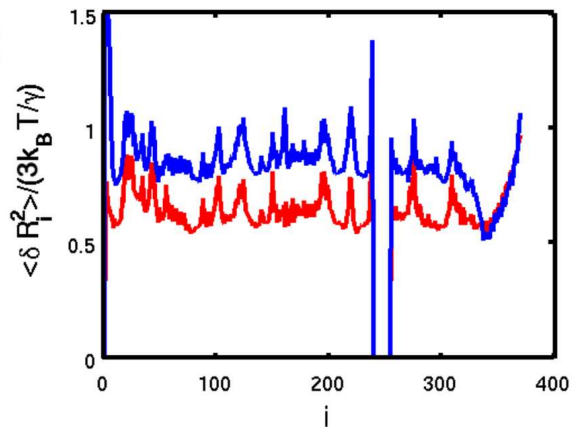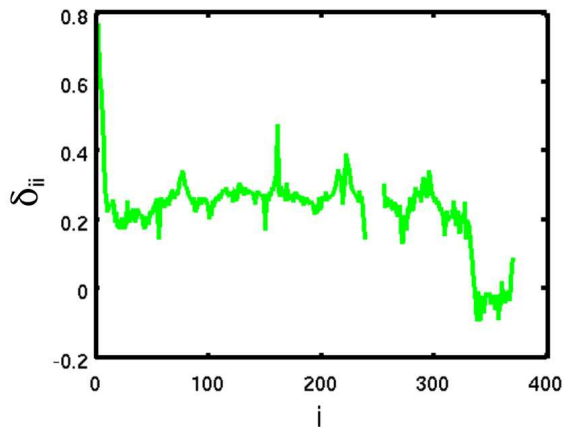

Supplement: pnas_0610939104_2.pdf [file pnas_0610939104_2.pdf]

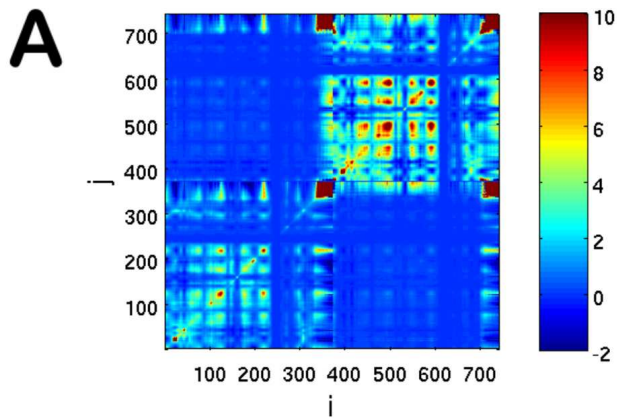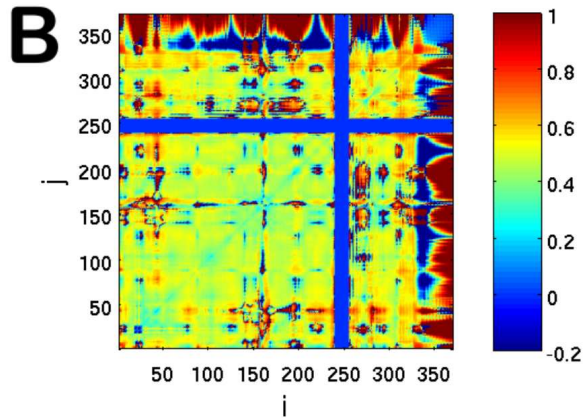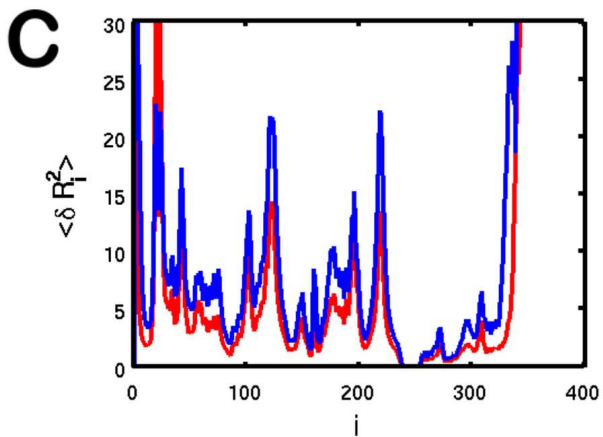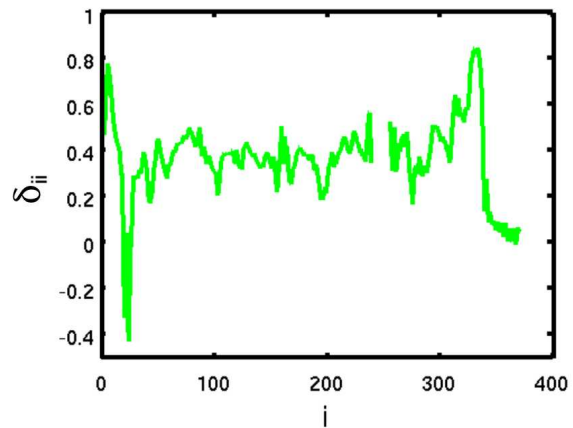

Supplement: pnas_0610939104_3.pdf [file pnas_0610939104_3.pdf]

**A**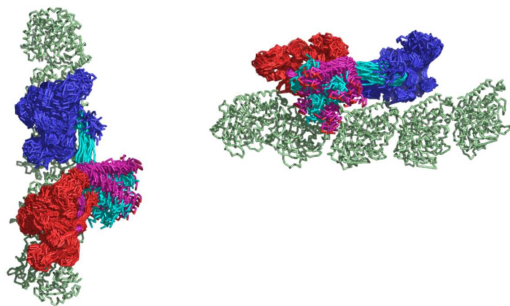**B**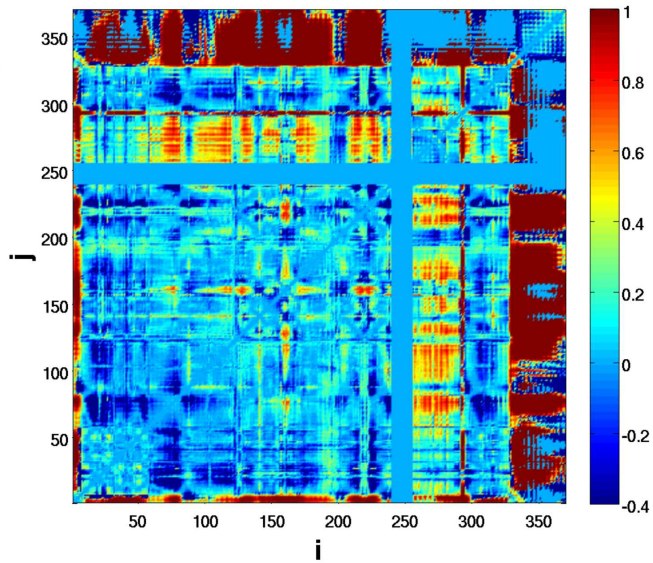**C**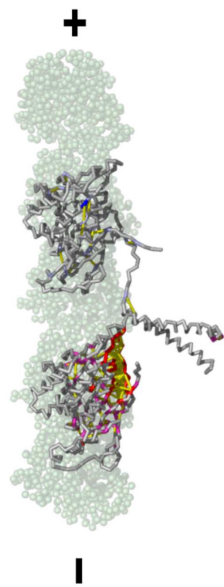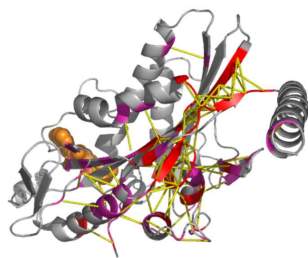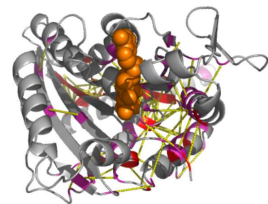

trailing head

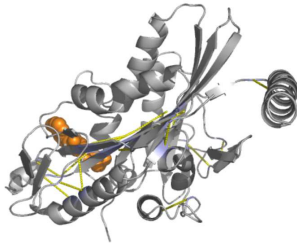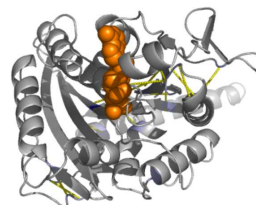

leading head

Supplement: pnas_0610939104_4.pdf [file pnas_0610939104_4.pdf]
